# Supplementary material for: Thermal Stability Enhancement of L-Asparaginase from Corynebacterium glutamicum Based on a Semi-Rational Design and Its Effect on Acrylamide Mitigation Capacity in Biscuits
Source: MDPI journal article supplement (doi:10.3390/foods12234364), 2023-12-03
Supplement: s1 [file s1]

Supplementary Materials for

# Thermal Stability Enhancement of L-Asparaginase from *Corynebacterium glutamicum* Based on a Semi-Rational Design and Its Effect on Acrylamide Mitigation Capacity in Biscuits

Huibing Chi <sup>†</sup>, Qingwei Jiang <sup>†</sup>, Yiqian Feng, Guizheng Zhang, Yilian Wang, Ping Zhu, Zhaoxin Lu and Fengxia Lu <sup>\*</sup>

College of Food Science and Technology, Nanjing Agricultural University, Nanjing 210095, China; t2023091@njau.edu.cn (H.C.); 2021121002@stu.njau.edu.cn (Q.J.); 2022808095@stu.njau.edu.cn (Y.F.); 2022108054@stu.njau.edu.cn (G.Z.); 2021808098@stu.njau.edu.cn (Y.W.); pingzhu@njau.edu.cn (P.Z.); fmb@njau.edu.cn (Z.L.)

<sup>\*</sup> Correspondence: lufengxia@njau.edu.cn; Tel.: +86-25-84395963

<sup>†</sup> These authors contributed equally to this work.

ORCID

Zhaoxin Lu: 0000-0001-9288-7419

Fengxia Lu: 0000-0003-0934-7847

Ping Zhu: 0000-0002-4393-7608

**Table S1.** Oligonucleotide primers used in site-point saturation mutagenesis

| Numbers | Sequences (5'→3')                            |
|---------|----------------------------------------------|
| I67-F   | CCTTCGAAN <u>NNK</u> CATGAAATCAATCGCCTGGATA  |
| I67-R   | TTCATGM <u>MNN</u> TTCGAAGGCGATCTGGGCGCCAT   |
| I70-F   | TCCATGAAN <u>NNK</u> AAATCGCCTGGATAGCAGCAGC  |
| I70-R   | GCGATT <u>MNN</u> TTCATGGATTTCGAAGGCGATCT    |
| N71-F   | ATGAAATC <u>NNK</u> CGCCTGGATAGCAGCAGCATG    |
| N71-R   | CAGGCG <u>MNN</u> GATTTCATGGATTTCGAAGGCGA    |
| N59-F   | TTC <u>NNK</u> GGCGCCCAGATCGCCTTCGAAATCCA    |
| N59-R   | ATCTGGGCGCC <u>MNN</u> GAAGCGCGGGGCGATC      |
| V100-F  | GGATGTT <u>NNK</u> GGCGTTGTTGTTACCCATGGCA    |
| V100-R  | CAACGCC <u>MNN</u> AACATCCGGATCTTCCAGAACTT   |
| N146-F  | CCG <u>NNK</u> AATCTGTTCGAAGCCTGCCTGATCGC    |
| N146-R  | TCGAACAGATT <u>MNN</u> CGGGCCATCGGCTTCCGG    |
| C152-F  | TTCGAAGCC <u>NNK</u> CTGATCGCCAGCGATCCGAG    |
| C152-R  | ATCAG <u>MNN</u> GGCTTCGAACAGATTATTCGGGCC    |
| E187-F  | ATACCAGCGAT <u>NNK</u> CTGGCCTTCGCCACCAAT    |
| E187-R  | CAG <u>MNN</u> ATCGCTGGTATGCCATTTAACGCAGC    |
| K259-F  | GGGC <u>NNK</u> GCCCTGGATGCCGGCATCCCGGTTGTT  |
| K259-R  | ATCCAGGGC <u>MNN</u> GCCCAGGGCATCGCCCATGC    |
| F302-F  | TCGGGAGCCGCTAT <u>NNK</u> CGCGCCGGCCAAGCCCGG |

| Numbers | Sequences (5'→3')                           |
|---------|---------------------------------------------|
| F302-R  | <u>MNN</u> ATAGCGGCTCCCGACGGCGCCTTTGGCGG    |
| T120-F  | CGCCGTTGAT <u>NNK</u> TTCCTGGATGATCCGCGCC   |
| T120-R  | GGA <u>MNN</u> ATCAACGGCGATGGCGCTTTCTTCC    |
| S213-F  | CGATGTT <u>NNK</u> GTTGAAATTATCCCGGCATATCC  |
| S213-R  | TTTCAAC <u>MNN</u> AACATCGGCCAGTTTGGCAACC   |
| T224-F  | GGTGC <u>NNK</u> GGTGCCATGGTGGAGGCCGCCAT    |
| T224-R  | ATGGCACC <u>MNN</u> TGCACCCGGATATGCCGGGAT   |
| H171-F  | TTTCGGC <u>NNK</u> GCCGTTATCCCGGCCCGCGGCT   |
| H171-R  | TAACGGC <u>MNN</u> GCCGAAAACGATCAGGGCGCCG   |
| K294-F  | AACACTCGCCGCC <u>NNK</u> GGCGCCGTCGGGAGCCGC |
| K294-R  | C <u>MNN</u> GGCGGCGAGTGTTGCTCCGCCGCCTGCA   |
| Y325-F  | CCATCCGTTACCCTG <u>NNK</u> CTCGAGG          |
| Y325-R  | CCTCGAG <u>MNN</u> CAGGGTAACCGGATGG         |
| K135-F  | CCCAG <u>NNK</u> CCGTTGATCATCCGGAAGCCGAT    |
| K135-R  | ATCGAACGG <u>MNN</u> CTGGGCCCCGGTGAAGATAA   |
| M227-F  | ACGGGTGCC <u>NNK</u> GTGGAGGCCGCGCATAGCGGC  |
| M227-R  | TCCAC <u>MNN</u> GGCACCCGTTGCACCCGGATATGC   |
| H40-F   | CAATGGC <u>NNK</u> CTTCTGCCGACCGTCAGCGGGG   |
| H40-R   | GCAGAAG <u>MNN</u> GCCATTGGCATCGCTGGTGCAG   |
| I313-F  | TCCTGCTAGCC <u>NNK</u> GCCATCGCGACCGG       |

| Numbers | Sequences (5'→3')                            |
|---------|----------------------------------------------|
| I313-R  | CCGGTCGCGATGGC <u>MNN</u> GGCTAGCAGGA        |
| S251-F  | ATGTTGGC <u>NNK</u> CGCATGGGCGATGCCCTGG      |
| S251-R  | CATGCG <u>MNN</u> GCCAACATTGCCGCTGCCCATGG    |
| M269-F  | GGTTGTT <u>NNK</u> AGCACCCGAGTTCCGCGCGGAG    |
| M269-R  | GGGTGCT <u>MNNA</u> ACAACCGGGATGCCGGCATCCA   |
| L42-F   | CACCTT <u>NNK</u> CCGACCGTCAGCGGGGCTGATCT    |
| L42-R   | ACGGTCGG <u>MNNA</u> AAGGTGGCCATTGGCATCGCT   |
| C179-F  | GC <u>NNK</u> GTAAATGGCATAACCAGCGATGAACTG    |
| C179-R  | ATGCCATTTAAC <u>MNN</u> GCCGCGGGCCGGGATAAC   |
| K208-F  | C <u>NNK</u> CTGGCCGATGTTAGCGTTGAAATTATCC    |
| K208-R  | TAACATCGGCCAG <u>MNN</u> GGCAACCGGCAGGGCATC  |
| Q62-F   | <u>NNK</u> ATCGCCTTCGAAATCCATGAAATCAATCG     |
| Q62-R   | ATTTCGAAGGCGAT <u>MNN</u> GGCGCCATTGAAGCGCGG |
| F65-F   | CC <u>NNK</u> GAAATCCATGAAATCAATCGCCTGGAT    |
| F65-R   | TTCATGGATTTC <u>MNN</u> GGCGATCTGGGCGCCATT   |

\*The mutation sites were underlined and highlight.

**Table S2.** Orthogonal experimental factors and levels

| Level | Factors         |                |                   |
|-------|-----------------|----------------|-------------------|
|       | A: Enzyme       | B: Enzyme      | C: Enzyme         |
|       |                 | reaction times | reaction          |
|       | dosages (IU/kg) | (min)          | temperatures (°C) |
| 1     | 100             | 30             | 30                |
| 2     | 300             | 40             | 40                |
| 3     | 500             | 50             | 50                |

**Table S3.** Combination of different processing conditions for three variable and three level orthogonal experiments

| Numbers | A: Enzyme dosages | B: Enzyme reaction | C: Enzyme reaction |
|---------|-------------------|--------------------|--------------------|
|         | (IU/kg)           | times (min)        | temperatures (°C)  |
| 1       | 100               | 30                 | 30                 |
| 2       | 100               | 40                 | 50                 |
| 3       | 100               | 50                 | 40                 |
| 4       | 300               | 30                 | 40                 |
| 5       | 300               | 50                 | 50                 |
| 6       | 300               | 40                 | 30                 |
| 7       | 500               | 40                 | 40                 |
| 8       | 500               | 50                 | 30                 |
| 9       | 500               | 30                 | 50                 |

**Table S4.** Potential stabilizing mutation sites, recommended mutant amino acids, and threshold values of CgASNase predicted by Consensus Finder

| Numbers | Sites | Amino acids in<br>CgASNase | Amino acids in<br>consensus<br>sequence | Frequency of amino<br>acids in the<br>consensus sequence |
|---------|-------|----------------------------|-----------------------------------------|----------------------------------------------------------|
| 1       | 302   | F                          | L                                       | 89%                                                      |
| 2       | 120   | T                          | L                                       | 80%                                                      |
| 3       | 213   | S                          | R                                       | 73%                                                      |
| 4       | 171   | H                          | G                                       | 71%                                                      |
| 5       | 224   | T                          | D                                       | 71%                                                      |
| 6       | 294   | K                          | A                                       | 68%                                                      |
| 7       | 325   | Y                          | F                                       | 66%                                                      |
| 8       | 135   | K                          | R                                       | 65%                                                      |
| 9       | 67    | I                          | V                                       | 59%                                                      |
| 10      | 70    | I                          | L                                       | 51%                                                      |
| 11      | 65    | F                          | V                                       | 51%                                                      |
| 12      | 227   | M                          | L                                       | 48%                                                      |
| 13      | 40    | H                          | A                                       | 47%                                                      |
| 14      | 313   | I                          | A                                       | 44%                                                      |
| 15      | 269   | M                          | V                                       | 42%                                                      |
| 16      | 42    | L                          | V                                       | 40%                                                      |

| Numbers | Sites | Amino acids in<br>CgASNase | Amino acids in<br>consensus<br>sequence | Frequency of amino<br>acids in the<br>consensus sequence |
|---------|-------|----------------------------|-----------------------------------------|----------------------------------------------------------|
| 17      | 251   | S                          | P                                       | 43%                                                      |
| 18      | 259   | K                          | R                                       | 37%                                                      |
| 19      | 187   | E                          | L                                       | 35%                                                      |
| 20      | 100   | V                          | D                                       | 35%                                                      |
| 21      | 152   | C                          | I                                       | 33%                                                      |
| 22      | 71    | N                          | M                                       | 30%                                                      |
| 23      | 59    | N                          | L                                       | 30%                                                      |
| 24      | 146   | N                          | R                                       | 31%                                                      |
| 25      | 179   | C                          | V                                       | 28%                                                      |
| 26      | 208   | K                          | P                                       | 28%                                                      |
| 27      | 62    | Q                          | G                                       | 26%                                                      |



**Table S5.** Analysis of results of orthogonal experiments

| Numbers | A:<br>Enzyme<br>dosages | B: Enzyme<br>reaction<br>times | C: Enzyme<br>reaction<br>temperatures | D:<br>Empty<br>column | Acrylamide<br>reduction (%) |
|---------|-------------------------|--------------------------------|---------------------------------------|-----------------------|-----------------------------|
| 1       | 1                       | 1                              | 1                                     | 1                     | 80.51±1.93 <sup>d</sup>     |
| 2       | 1                       | 2                              | 3                                     | 2                     | 85.14±2.84 <sup>c</sup>     |
| 3       | 1                       | 3                              | 2                                     | 3                     | 89.97±1.89 <sup>b</sup>     |
| 4       | 2                       | 1                              | 2                                     | 2                     | 92.35±2.03 <sup>a</sup>     |
| 5       | 2                       | 3                              | 3                                     | 1                     | 90.02±0.58 <sup>b</sup>     |
| 6       | 2                       | 2                              | 1                                     | 3                     | 92.01±1.18 <sup>a</sup>     |
| 7       | 3                       | 2                              | 2                                     | 1                     | 75.42±2.81 <sup>e</sup>     |
| 8       | 3                       | 3                              | 1                                     | 2                     | 76.64±2.96 <sup>e</sup>     |
| 9       | 3                       | 1                              | 3                                     | 3                     | 63.35±3.92 <sup>f</sup>     |
| K1      | 85.307                  | 78.737                         | 83.067                                | 80.317                |                             |
| K2      | 91.473                  | 82.537                         | 84.247                                | 84.710                |                             |
| K3      | 70.137                  | 85.543                         | 79.503                                | 81.790                |                             |
| R       | 31.336                  | 6.806                          | 4.744                                 | 4.393                 | RA>RB>RC>RD                 |

**Table S6.** Analysis of variance (ANOVA) for results of orthogonal experiments

| Source of variation | Deviation sum of squares | Degree of freedom | F ratio | F critical value | Significance |
|---------------------|--------------------------|-------------------|---------|------------------|--------------|
| A                   | 721.639                  | 2                 | 24.056  | 19.0             | *            |
| B                   | 69.811                   | 2                 | 2.327   | 19.0             |              |
| C                   | 36.589                   | 2                 | 1.220   | 19.0             |              |
| Errors              | 30                       | 2                 |         |                  |              |

Note: \* indicates a significant difference between samples ( $p < 0.05$ ).

**Table S7.** Effect of different enzymatic reaction times on the inhibition of acrylamide

in biscuits

| Number | A: Enzyme | B: Enzyme   | C: Enzyme    | Acrylamide<br>reduction (%) |
|--------|-----------|-------------|--------------|-----------------------------|
|        | dosages   | treatment   | treatment    |                             |
|        | (IU/kg)   | times (min) | temperatures |                             |
|        |           |             | (°C)         |                             |
| A2B1C2 | 300       | 30          | 40           | 92.35±2.03 <sup>a</sup>     |
| A2B2C2 | 300       | 40          | 40           | 92.87±1.81 <sup>a</sup>     |
| A2B3C2 | 300       | 50          | 40           | 93.02±1.86 <sup>a</sup>     |
